# Supplementary material for: Two New Uromunna Species (Isopoda: Asellota: Munnidae) from the Korean Peninsula and Their Phylogenetic Position within Munnoid Groups
Source: MDPI journal article supplement (doi:10.3390/d15010020), 2022-12-22
Supplement: s1 [file s1]

**Table S1.** Uncorrected pair-wise distance matrix of COI, Cytb, and 18S

|          | OP737461 | KX186724 | KJ736157 | JQ921083 | OP737458 | OP737459 | OP737460 |
|----------|----------|----------|----------|----------|----------|----------|----------|
| OP737461 |          | 97.99    | 67.02    | 64.72    | 62.2     | 62.2     | 60.39    |
| KX186724 | 97.99    |          | 72.29    | 66.01    | 62.7     | 62.7     | 60.52    |
| KJ736157 | 67.02    | 72.29    |          | 64.09    | 57.34    | 57.34    | 57.03    |
| JQ921083 | 64.72    | 66.01    | 64.09    |          | 57.67    | 57.67    | 56.09    |
| OP737458 | 62.2     | 62.7     | 57.34    | 57.67    |          | 100      | 80.03    |
| OP737459 | 62.2     | 62.7     | 57.34    | 57.67    | 100      |          | 80.03    |
| OP737460 | 60.39    | 60.52    | 57.03    | 56.09    | 80.03    | 80.03    |          |

1. COI uncorrected pair-wise distance matrix expressed as the percentage of identity (%). ID: GenBank code.

|                  | OP7<br>4542<br>5 | OP7<br>4542<br>6 | OP7<br>4542<br>7 | OP7<br>4542<br>8 | OP7<br>4542<br>9 | OP7<br>4543<br>0 | OP7<br>4543<br>1 | OP7<br>4543<br>2 | OP7<br>4543<br>3 | OP7<br>4543<br>4 | OP7<br>4543<br>5 | OP7<br>4543<br>6 | OP7<br>4543<br>7 | OP7<br>4543<br>8 | OP7<br>4543<br>9 | OP7<br>4544<br>0 | OP7<br>4544<br>1 | OP7<br>4544<br>2 | OP7<br>4544<br>3 |
|------------------|------------------|------------------|------------------|------------------|------------------|------------------|------------------|------------------|------------------|------------------|------------------|------------------|------------------|------------------|------------------|------------------|------------------|------------------|------------------|
| OP7<br>4542<br>5 |                  | 58.06            | 58.06            | 58.06            | 58.06            | 58.06            | 58.06            | 58.06            | 58.06            | 58.06            | 58.06            | 58.06            | 58.06            | 58.06            | 58.06            | 58.06            | 58.06            | 58.31            | 58.31            |
| OP7<br>4542<br>6 | 58.06            |                  | 100              | 100              | 100              | 100              | 100              | 100              | 100              | 100              | 100              | 100              | 100              | 100              | 100              | 100              | 100              | 99.74            | 99.74            |
| OP7<br>4542<br>7 | 58.06            | 100              |                  | 100              | 100              | 100              | 100              | 100              | 100              | 100              | 100              | 100              | 100              | 100              | 100              | 100              | 100              | 99.74            | 99.74            |
| OP7<br>4542<br>8 | 58.06            | 100              | 100              |                  | 100              | 100              | 100              | 100              | 100              | 100              | 100              | 100              | 100              | 100              | 100              | 100              | 100              | 99.74            | 99.74            |
| OP7<br>4542<br>9 | 58.06            | 100              | 100              | 100              |                  | 100              | 100              | 100              | 100              | 100              | 100              | 100              | 100              | 100              | 100              | 100              | 100              | 99.74            | 99.74            |
| OP7<br>4543<br>0 | 58.06            | 100              | 100              | 100              | 100              |                  | 100              | 100              | 100              | 100              | 100              | 100              | 100              | 100              | 100              | 100              | 100              | 99.74            | 99.74            |
| OP7<br>4543<br>1 | 58.06            | 100              | 100              | 100              | 100              | 100              |                  | 100              | 100              | 100              | 100              | 100              | 100              | 100              | 100              | 100              | 100              | 99.74            | 99.74            |
| OP7<br>4543<br>2 | 58.06            | 100              | 100              | 100              | 100              | 100              | 100              |                  | 100              | 100              | 100              | 100              | 100              | 100              | 100              | 100              | 100              | 99.74            | 99.74            |
| OP7<br>4543<br>3 | 58.06            | 100              | 100              | 100              | 100              | 100              | 100              | 100              |                  | 100              | 100              | 100              | 100              | 100              | 100              | 100              | 100              | 99.74            | 99.74            |
| OP7<br>4543<br>4 | 58.06            | 100              | 100              | 100              | 100              | 100              | 100              | 100              | 100              |                  | 100              | 100              | 100              | 100              | 100              | 100              | 100              | 99.74            | 99.74            |
| OP7<br>4543<br>5 | 58.06            | 100              | 100              | 100              | 100              | 100              | 100              | 100              | 100              | 100              |                  | 100              | 100              | 100              | 100              | 100              | 100              | 99.74            | 99.74            |
| OP7<br>4543<br>6 | 58.06            | 100              | 100              | 100              | 100              | 100              | 100              | 100              | 100              | 100              | 100              |                  | 100              | 100              | 100              | 100              | 100              | 99.74            | 99.74            |
| OP7<br>4543<br>7 | 58.06            | 100              | 100              | 100              | 100              | 100              | 100              | 100              | 100              | 100              | 100              | 100              |                  | 100              | 100              | 100              | 100              | 99.74            | 99.74            |
| OP7<br>4543<br>8 | 58.06            | 100              | 100              | 100              | 100              | 100              | 100              | 100              | 100              | 100              | 100              | 100              | 100              |                  | 100              | 100              | 100              | 99.74            | 99.74            |
| OP7<br>4543<br>9 | 58.06            | 100              | 100              | 100              | 100              | 100              | 100              | 100              | 100              | 100              | 100              | 100              | 100              | 100              |                  | 100              | 100              | 99.74            | 99.74            |
| OP7<br>4544<br>0 | 58.06            | 100              | 100              | 100              | 100              | 100              | 100              | 100              | 100              | 100              | 100              | 100              | 100              | 100              | 100              |                  | 100              | 99.74            | 99.74            |
| OP7<br>4544<br>1 | 58.06            | 100              | 100              | 100              | 100              | 100              | 100              | 100              | 100              | 100              | 100              | 100              | 100              | 100              | 100              | 100              |                  | 99.74            | 99.74            |
| OP7<br>4544<br>2 | 58.31            | 99.74            | 99.74            | 99.74            | 99.74            | 99.74            | 99.74            | 99.74            | 99.74            | 99.74            | 99.74            | 99.74            | 99.74            | 99.74            | 99.74            | 99.74            | 99.74            |                  | 100              |
| OP7<br>4544<br>3 | 58.31            | 99.74            | 99.74            | 99.74            | 99.74            | 99.74            | 99.74            | 99.74            | 99.74            | 99.74            | 99.74            | 99.74            | 99.74            | 99.74            | 99.74            | 99.74            | 99.74            | 100              |                  |

2. Cytb uncorrected pair-wise distance matrix expressed as the percentage of identity (%). ID: GenBank code.

|              | KX46<br>7630 | OP73<br>0549 | OP73<br>0548 | OP73<br>0554 | OP73<br>0553 | OP73<br>0552 | OP73<br>0551 | OP73<br>0550 | AF49<br>6663 | AY46<br>1470 | EU41<br>4424 | AY46<br>1464 | EU41<br>4421 | EU41<br>4437 | OP73<br>0547 |
|--------------|--------------|--------------|--------------|--------------|--------------|--------------|--------------|--------------|--------------|--------------|--------------|--------------|--------------|--------------|--------------|
| KX467630     |              | 93.48        | 93.48        | 93.48        | 93.63        | 93.63        | 93.63        | 93.63        | 72.17        | 72.33        | 72.35        | 75.31        | 69.5         | 73.22        | 68.57        |
| OP73<br>0549 | 93.48        |              | 100          | 100          | 99.64        | 99.64        | 99.64        | 99.64        | 72.79        | 72.6         | 72.89        | 75.18        | 69.15        | 73.48        | 69.15        |
| OP73<br>0548 | 93.48        | 100          |              | 100          | 99.64        | 99.64        | 99.64        | 99.64        | 72.79        | 72.6         | 72.89        | 75.18        | 69.15        | 73.48        | 69.15        |
| OP73<br>0554 | 93.48        | 100          | 100          |              | 99.64        | 99.64        | 99.64        | 99.64        | 72.74        | 72.55        | 72.84        | 75.13        | 69.15        | 73.43        | 69.1         |
| OP73<br>0553 | 93.63        | 99.64        | 99.64        | 99.64        |              | 100          | 100          | 100          | 72.65        | 72.65        | 72.94        | 75.18        | 69.33        | 73.53        | 69.11        |
| OP73<br>0552 | 93.63        | 99.64        | 99.64        | 99.64        | 100          |              | 100          | 100          | 72.65        | 72.65        | 72.94        | 75.18        | 69.33        | 73.53        | 69.11        |
| OP73<br>0551 | 93.63        | 99.64        | 99.64        | 99.64        | 100          | 100          |              | 100          | 72.65        | 72.65        | 72.94        | 75.18        | 69.33        | 73.53        | 69.11        |
| OP73<br>0550 | 93.63        | 99.64        | 99.64        | 99.64        | 100          | 100          | 100          |              | 72.65        | 72.65        | 72.94        | 75.18        | 69.33        | 73.53        | 69.11        |
| AF49<br>6663 | 72.17        | 72.79        | 72.79        | 72.74        | 72.65        | 72.65        | 72.65        | 72.65        |              | 72.5         | 72.76        | 73.16        | 71.64        | 73.78        | 64.47        |
| AY46<br>1470 | 72.33        | 72.6         | 72.6         | 72.55        | 72.65        | 72.65        | 72.65        | 72.65        | 72.5         |              | 95.73        | 84.41        | 79.88        | 81.33        | 65.23        |
| EU41<br>4424 | 72.35        | 72.89        | 72.89        | 72.84        | 72.94        | 72.94        | 72.94        | 72.94        | 72.76        | 95.73        |              | 84.53        | 80.28        | 81.2         | 65.5         |
| AY46<br>1464 | 75.31        | 75.18        | 75.18        | 75.13        | 75.18        | 75.18        | 75.18        | 75.18        | 73.16        | 84.41        | 84.53        |              | 82.02        | 80.99        | 66.85        |
| EU41<br>4421 | 69.5         | 69.15        | 69.15        | 69.15        | 69.33        | 69.33        | 69.33        | 69.33        | 71.64        | 79.88        | 80.28        | 82.02        |              | 78.1         | 64.44        |
| EU41<br>4437 | 73.22        | 73.48        | 73.48        | 73.43        | 73.53        | 73.53        | 73.53        | 73.53        | 73.78        | 81.33        | 81.2         | 80.99        | 78.1         |              | 65.44        |
| OP73<br>0547 | 68.57        | 69.15        | 69.15        | 69.1         | 69.11        | 69.11        | 69.11        | 69.11        | 64.47        | 65.23        | 65.5         | 66.85        | 64.44        | 65.44        |              |

3. 18S uncorrected pair-wise distance matrix expressed as the percentage of identity (%). ID: GenBank code.
